# Supplementary material
Source: PubMed Central journal article supplement (PMC3276459)
Supplement: supp_M019257_jlr.M019257-1.pdf [file supp_M019257_jlr.M019257-1.pdf]

## Supplemental information

### Supplementary figures

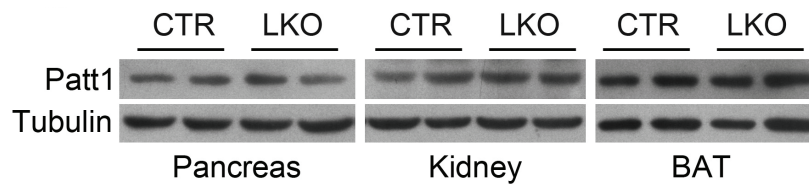

**Supplementary Fig. S1.** Patt1 protein levels remain unchanged in pancreas, kidney and brown adipose tissue (BAT) of Patt1 LKO mice. Expression of Patt1 was measured by immunoblot, and tubulin was measured as a loading control.

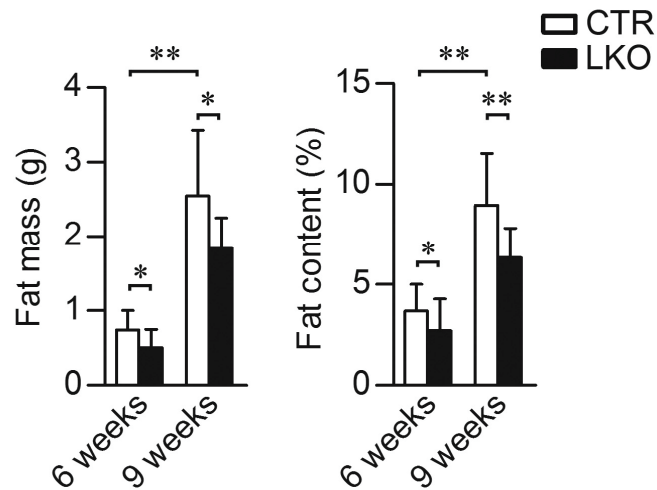

**Supplementary Fig. S2.** Male Patt1 LKO mice showed decreased fat mass and fat content at the age of 6 and 9 weeks. n = 8-12/group, \*p < 0.05, \*\*p < 0.01.

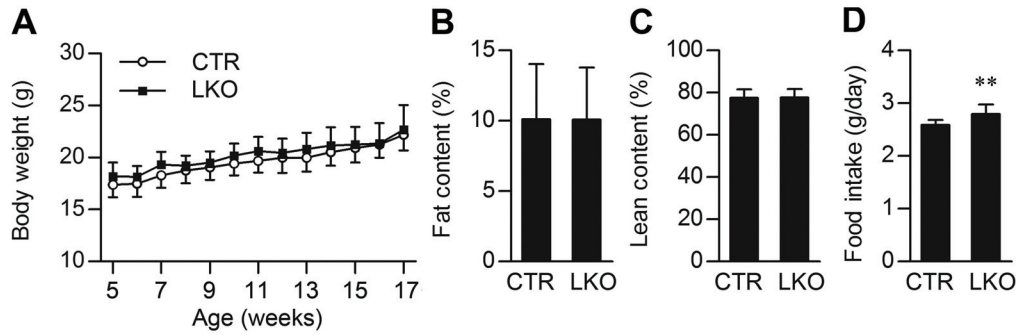

**Supplementary Fig. S3.** (A) Female *Patt1* LKO mice exhibited similar body weight as their littermate controls. (B and C) Female *Patt1* LKO mice at the age of 20 weeks exhibited similar fat content and lean content as their littermate controls. (D) Food intake of the female *Patt1* LKO mice was slightly increased when monitored at the age of 15 to 17 weeks.  $n = 6-9/\text{group}$ ,  $**p < 0.01$ .

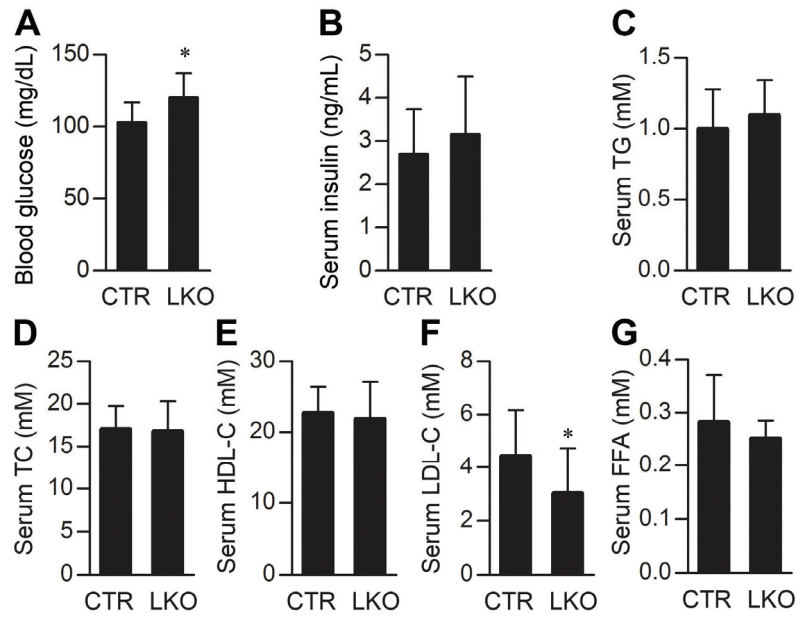

**Supplementary Fig. S4.** (A) Blood glucose was increased in 15-week-old male *Patt1* LKO mice fasted for 14 h. (B-G) Serum insulin, triglyceride (TG), total cholesterol (TC), HDL-cholesterol (HDL-C) and free fatty acid (FFA) remained unchanged, while LDL-cholesterol (LDL-C) was attenuated in 31-week-old male *Patt1* LKO mice fasted for 6 h. n = 10-12/group, \*p < 0.05.

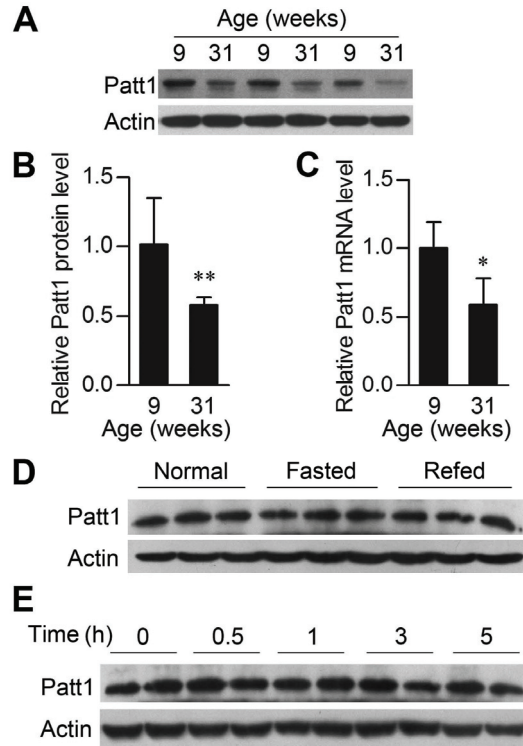

**Supplementary Fig. S5.** (A) Hepatic Patt1 protein level was downregulated in 31-week-old male mice compared with that in 9-week-old male mice. (B) Quantification of the Patt1 protein level in (A).  $n = 6/\text{group}$ ,  $**p < 0.01$ . (C) Hepatic Patt1 mRNA level was also downregulated in 31-week-old male mice.  $n = 6/\text{group}$ ,  $*p < 0.05$ . (D) Hepatic Patt1 protein level remained unchanged in 9-week-old male mice fasted for 24 h, or fasted for 24 h and then refed for 24 h.  $n = 3$ . (E) Primary mouse hepatocytes treated with 100 nM insulin for the indicated times had similar Patt1 protein level.

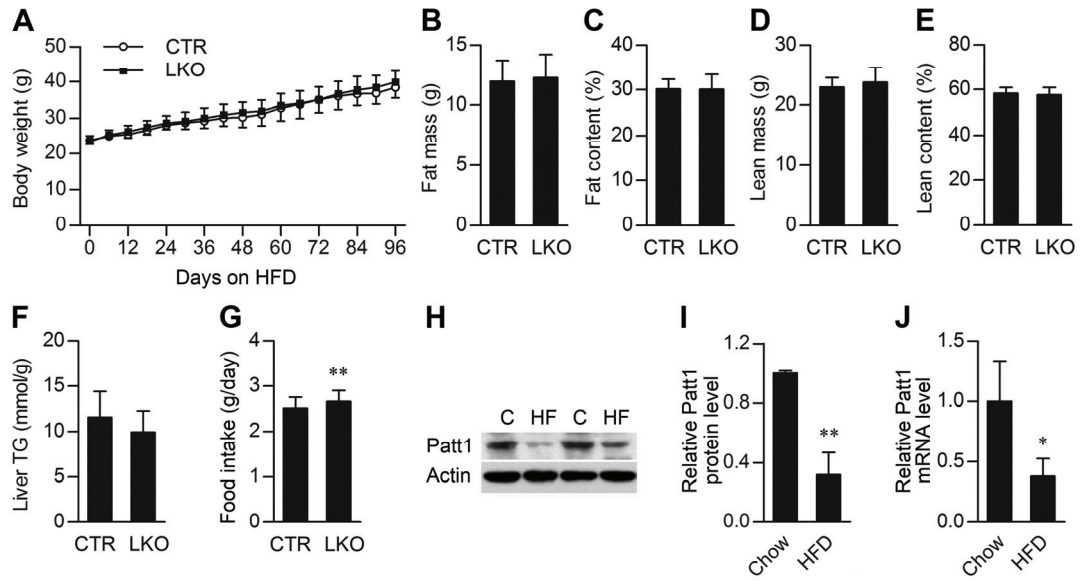

**Supplementary Fig. S6.** (A-F) After fed HFD for 14 weeks, body weight, fat mass, fat content, lean mass, lean content and liver triglyceride were similar between the 22-week-old male Patt1 LKO mice and their littermate controls.  $n = 12/\text{group}$ . (G) Food intake was increased in male Patt1 LKO mice fed HFD when monitored at the age of 15-17 weeks.  $n = 12/\text{group}$ ,  $**p < 0.01$ . (H) Hepatic Patt1 protein level was dramatically decreased in the 22-week-old mice fed HFD (HF) for 14 weeks compared with that in mice fed chow (C). (I) Quantification of the Patt1 protein level in (H).  $n = 6/\text{group}$ ,  $**p < 0.01$ . (J) Hepatic Patt1 mRNA level was also significantly downregulated in the 22-week-old mice fed HFD for 14 weeks.  $n = 6/\text{group}$ ,  $*p < 0.05$ .

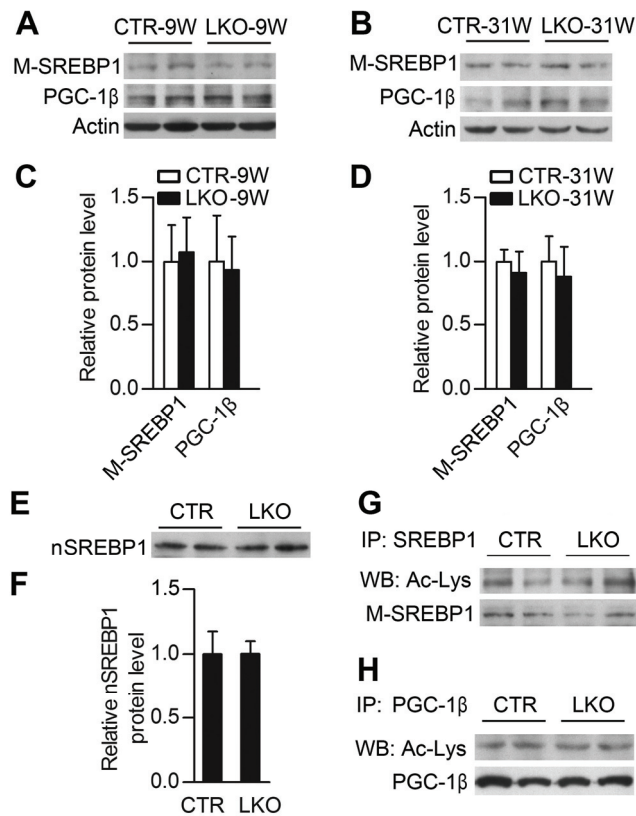

**Supplementary Fig. S7. (A and B)** Mature SREBP1 (M-SREBP1) and PGC-1 $\beta$  protein levels remained unchanged in the liver of male *Patt1* LKO mice at the age of 9 or 31 weeks. **(C and D)** Quantification of the indicated protein levels in **(A and B)**.  $n = 3$ . **(E)** Nuclear SREBP1 (nSREBP1) was not affected by hepatic *Patt1* knockout. Liver nuclear extracts with equal amount of total protein from 15-week-old male *Patt1* LKO mice and the littermate controls were subjected to immunoblot analysis. **(F)** Quantification of the nuclear SREBP1 protein levels in **(E)**.  $n = 3$ . **(G and H)** Acetylation of mature SREBP1 and PGC-1 $\beta$  was similar between male *Patt1* LKO mice and the littermate controls. Liver lysates from 9-week-old male *Patt1* LKO mice and the littermate controls were immunoprecipitated with the indicated antibodies and then measured by western blot.

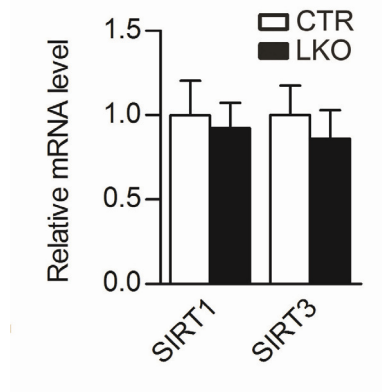

**Supplementary Fig. S8.** SIRT1 and SIRT3 mRNA levels were unchanged in 9-week-old male *Patt1* LKO mice compared with those in littermate controls. n = 6/group.

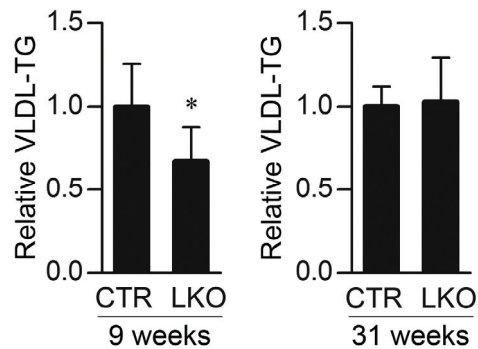

**Supplementary Fig. S9.** Serum triglyceride in VLDL (VLDL-TG) was significantly downregulated in 9-week-old but not 31-week-old male *Patt1* LKO mice. n = 6-8/group, \*p < 0.05.

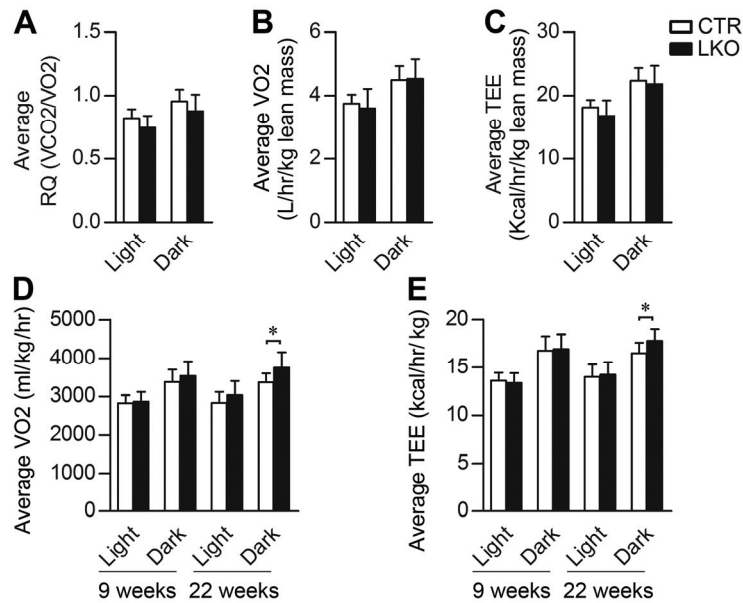

**Supplementary Fig. S10.** (A-C) 9-week-old male *Patt1* LKO mice showed similar respiratory quotient (RQ), oxygen consumption (VO<sub>2</sub>) and total energy expenditure (TEE) when measured by a comprehensive laboratory animal monitoring system. *n* = 6-8/group. (D-E) Oxygen consumption and total energy expenditure normalized to body weight during the dark phase were increased in 22-week-old but not 9-week-old male *Patt1* LKO mice when compared with littermate controls. *n* = 6-10/group, \**p* < 0.05.

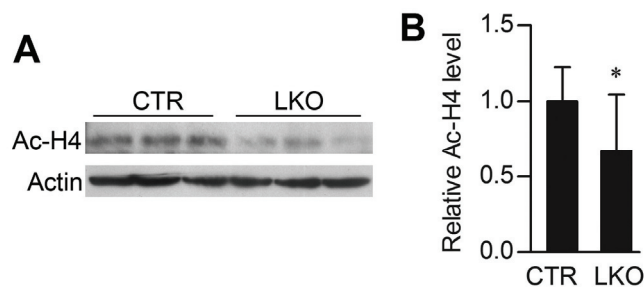

**Supplementary Fig. S11.** (A) Acetylated of histone H4 (Ac-H4) was decreased in 31-week-old male *Patt1* LKO mice when measured by immunoblot. (B) Quantification of the acetylated histone H4 in (A). *n* = 9, \**p* < 0.05.



## Supplemental Table 1

Primers used in real-time PCR.

| Gene           | Forward primer                 | Reverse primer                 |
|----------------|--------------------------------|--------------------------------|
| CD36           | 5'-ATGGGCTGTGATCGGAACTG-3'     | 5'-GTCTTCCCAATAAGCATGTCTCC-3'  |
| FATP           | 5'-CACGATCCCGTGCATCTTCC-3'     | 5'-AGCATTGGAGTAGGTGTCCAG-3'    |
| PPAR $\alpha$  | 5'-GAGAAGTTGCAGGAGGGGATTGTG-3' | 5'-AAGACTACCTGCTACCGAAATGGG-3' |
| PPAR $\gamma$  | 5'-GTGCCAGTTTCGATCCGTAGA-3'    | 5'-GGCCAGCATCGTGTAGATGA-3'     |
| C/EBP $\alpha$ | 5'-GAACAGCAACGAGTACCGGGTA-3'   | 5'-GCCATGGCCTTGACCAAGGAG-3'    |
| LXR $\alpha$   | 5'-GCAGGACCAGCTCCAAGTAG-3'     | 5'-GGCTCACCAGCTTCATTAGC-3'     |
| SREBP1C        | 5'-GGAGCCATGGATTGCACATT-3'     | 5'-GGAAGTCACTGTCTTGTTGTTGA-3'  |
| ACL            | 5'-TGGATGCCACAGCTGACTAC-3'     | 5'-GGTTCAGCAAGGTCAGCTTC-3'     |
| ACC1           | 5'-TGAATCTCACGCGCCTACTATG-3'   | 5'-ATGACCCTGTTGCCTCCAAAC-3'    |
| FAS            | 5'-AAGTTGCCCGAGTCAGAGAA-3'     | 5'-CGTCGAACTTGGAGAGATCC-3'     |
| ELOVL6         | 5'-GAAAAGCAGTTCAACGAGAACG-3'   | 5'-AGATGCCGACCACCAAAGATA-3'    |
| SCD1           | 5'-TTCTTGCGATACACTCTGGTGC-3'   | 5'-CGGGATTGAATGTTCTTGTCGT-3'   |
| GPAT           | 5'-ACAGTTGGCACAATAGACGTTT-3'   | 5'-CCTTCCATTTCAGTGTTGCAGA-3'   |
| DGAT1          | 5'-TGTTCACTCAGACAGTGGTT-3'     | 5'-CCACCAGGATGCCATACTTGAT-3'   |
| DGAT2          | 5'-GCGTACTTCCGAGACTACTT-3'     | 5'-GGGCCTTATGCCAGGAAACT-3'     |
| Patt1          | 5'-TGCAGACGATGTATGAGCAA-3'     | 5'-CACATCAAACCGGAAGTGAG-3'     |
| SIRT1          | 5'-GCCAGAGTCCAAGTTTAGAAGA-3'   | 5'-CCATCAGTCCCAAATCCAG-3'      |
| SIRT3          | 5'-TCTATACAGAACATCGACGGG-3'    | 5'-AGACCGTGCATGTAGCTGTTA-3'    |
| Actin          | 5'-GGCTGTATTCCCCTCCATCG-3'     | 5'-CCAGTTGGTAACAATGCCATGT-3'   |
